# Supplementary material
Source: publisher site journal article supplement (https://www.dovepress.com/article/299646)
Supplement: Supplementary file 1 [file get_supplementary_file.php]

**Supplementary figure**


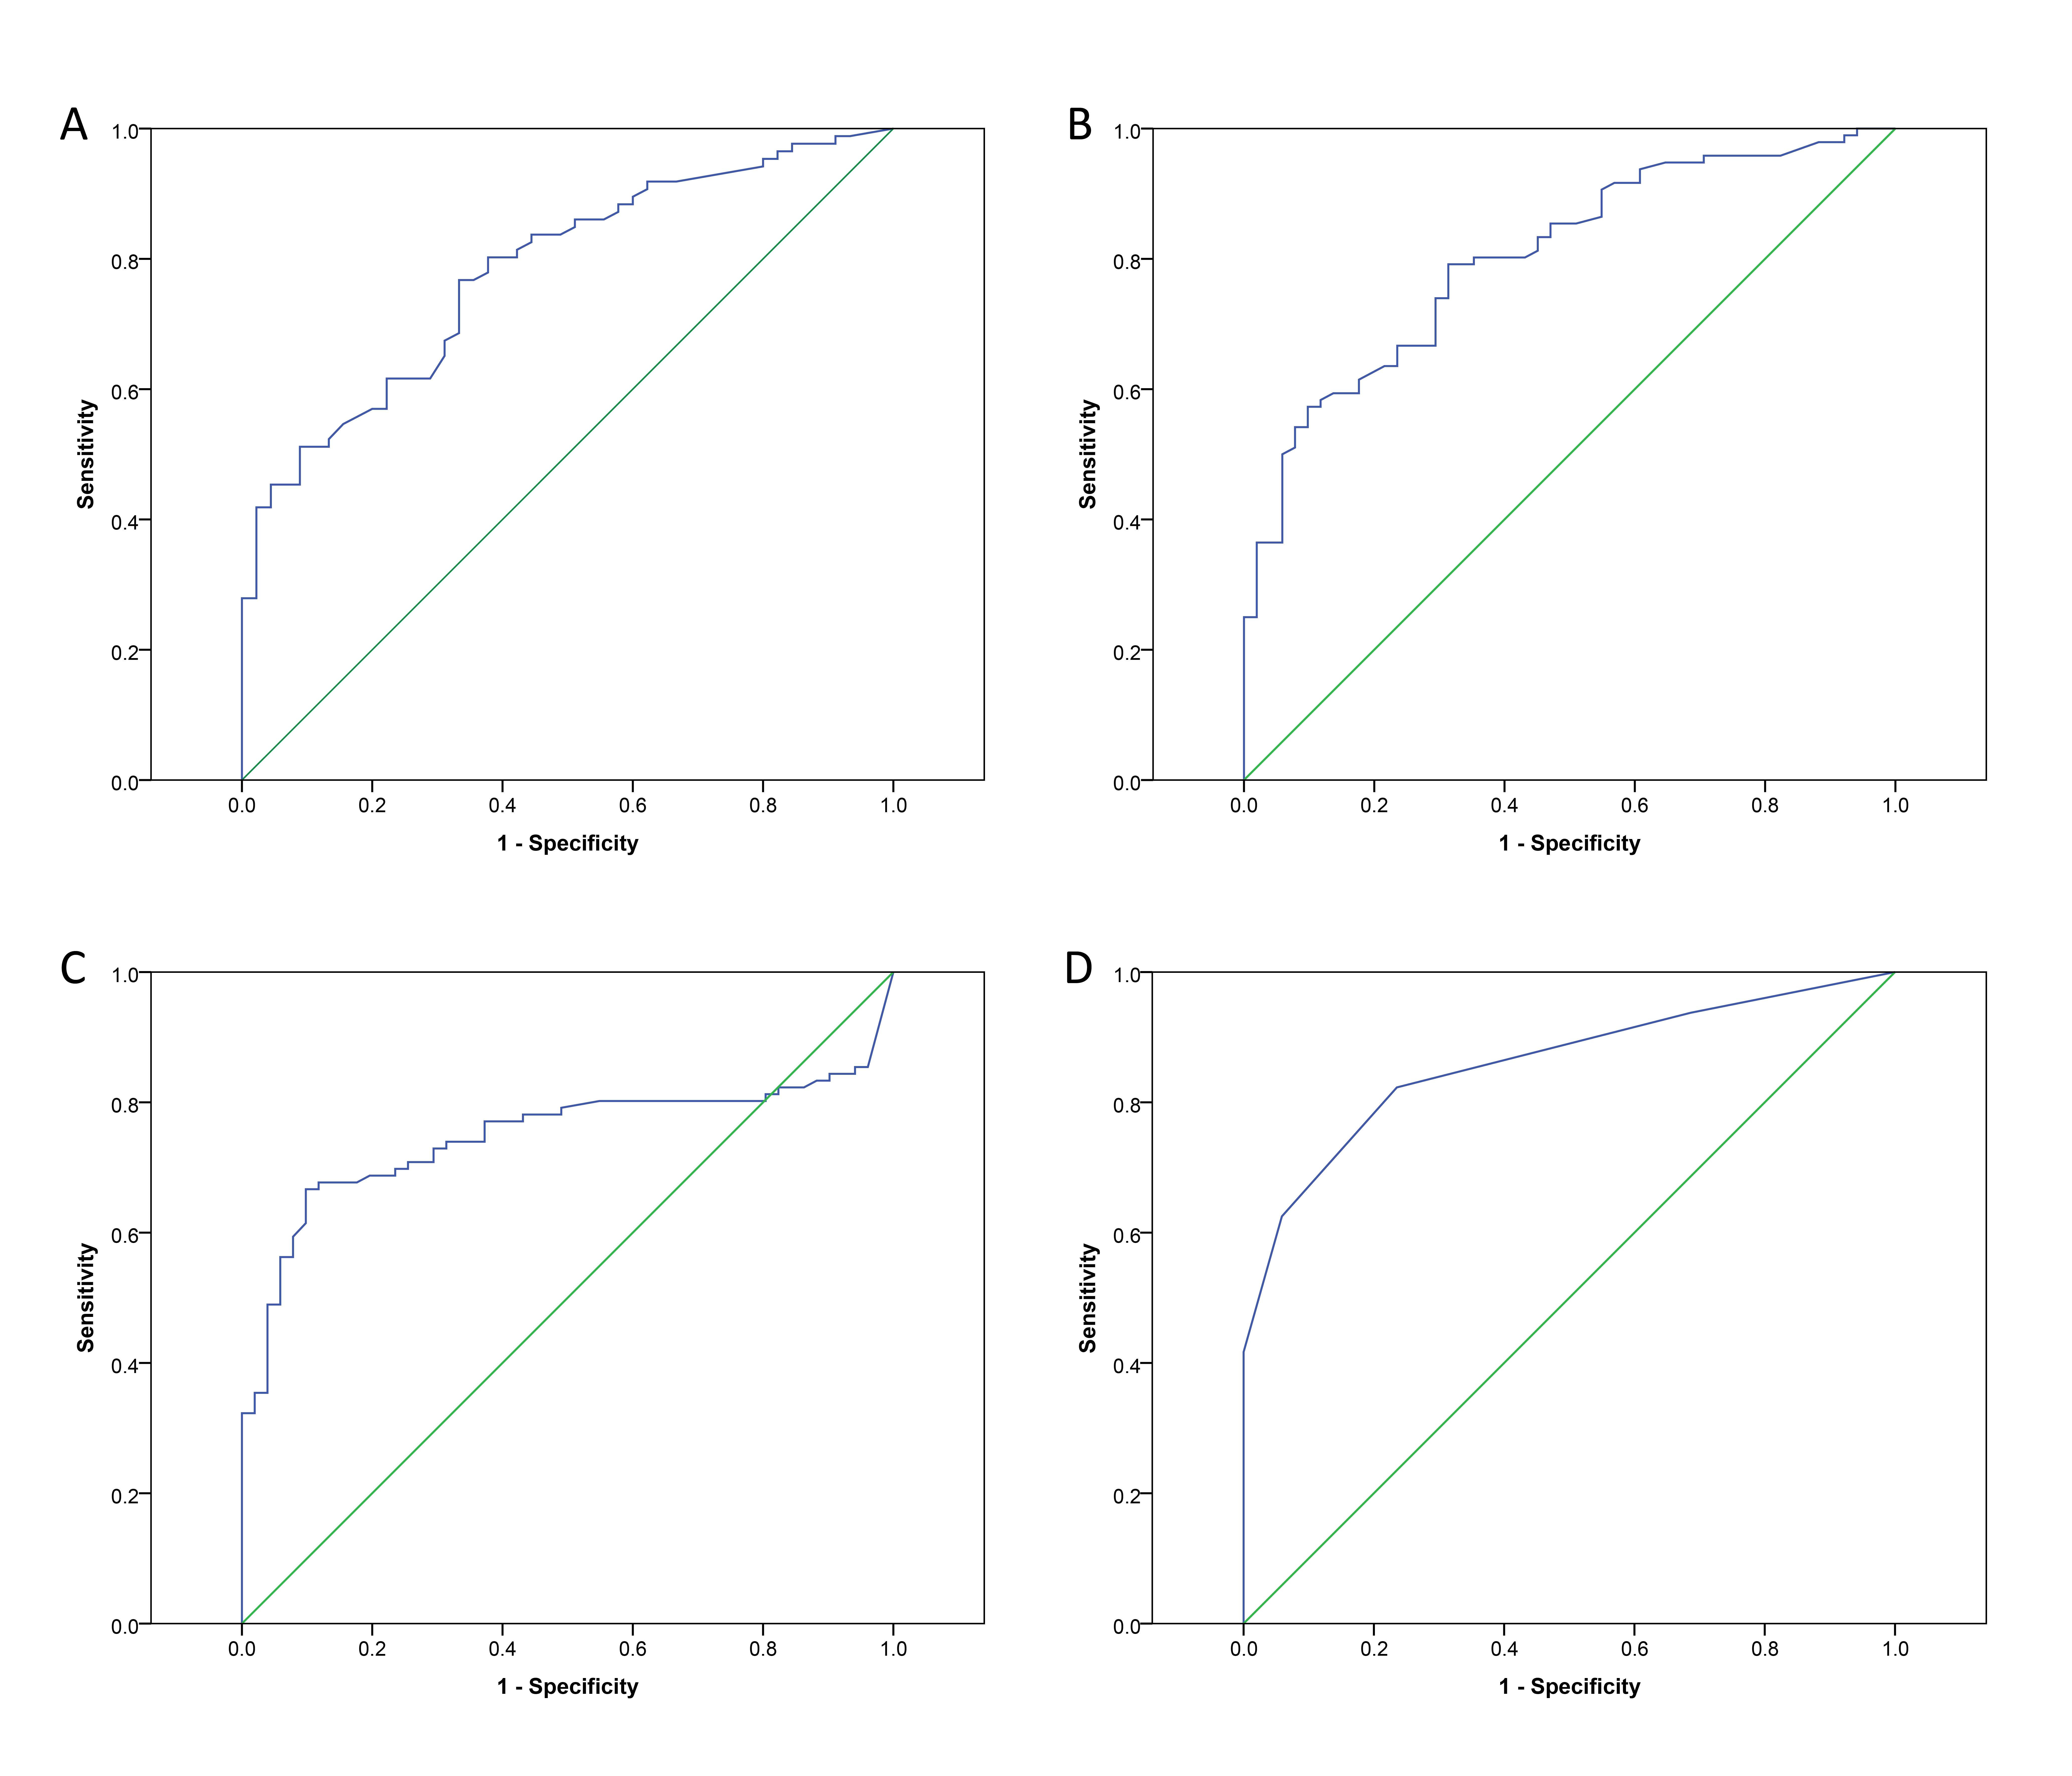


**Supplementary Figure 1.** Predictive value of LTA, AHI, Fevents-in REM, and the screening scoring criteria for high carotid body chemosensitivity (hCBC). (A) For the predictive value of longest time of apnea (LTA), the area under the ROC curve (AUC) was 0.780 (95% confidence interval (CI): 0.702–0.859; *P*<0.001); using a cutoff value of 48.4 s resulted in a specificity of 78.8% and a sensitivity of 79.1%. (B) For the predictive value of AHI, the AUC was 0.803 (95% CI: 0.732–0.873; *P*<0.001); using a cutoff value of 15.7%, the specificity was 78.6%, and the sensitivity was 79.2%. (C) For the predictive value of Fevents-in-REM, the AUC was 0.748 (95% CI: 0.668–0.828; *P*<0.001); using a cutoff value of 12.7% resulted in a specificity of 77.7% and a sensitivity of 78.4%. (D) For the predictive value of the screening scoring criteria for hCBC, the AUC was 0.852 (95% CI: 0.792–0.911; *P*<0.001), and sensitivity was 79.4%, and specificity was 88.2% using a cutoff value of 3.

**Supplementary Tables**

**Supplementary Table 1.** Supplement data of demographic variables and polysomnography

| Characteristics | Total (n=180) | Non-OSA (n=38) | OSA (n=142) | Mild (n=37) | Moderate (n=40) | Severe (n=65) |
| --- | --- | --- | --- | --- | --- | --- |
| Neck circumference, cm | 39.2±4.3 | 36.2±3.7 | 40.9±3.7 | 37.0±4.2 | 38.5±4.7 | 42.3±4.2* |
| Abd. Circumference, cm | 94.7±11.3 | 89.0±9.9 | 97.9±10.8 | 87.5±8.7 | 95.2±13.1 | 102.3±11.5* |
| Smoking, n (%) | 35 (19.4) | 8 (20.5) | 27 (19.0) | 6 (16.2) | 7 (17.5) | 14 (21.5) |
| Systolic BP, mmHg | 126.7±7.3 | 125.3±6.8 | 127.6±7.6 | 128.7±6.2 | 134.3±8.8 | 128.7±9.6 |
| Diastolic BP, mmHg | 77.0±9.1 | 73.8±9.4 | 78.7±8.5 | 75.5±10.2 | 70.1±9.7 | 79.9±9.2 |
| Complications n (%) |  |  |  |  |  |  |
| Hypertension | 34 (18.9) | 9 (23.7) | 25 (17.6) | 4 (10.8) | 3 (7.5) | 18 (27.7) * |
| Diabetes mellitus | 14 (7.8) | 3 (8.9) | 11 (7.7) | 3 (8.1) | 3 (7.5) | 5 (7.7) |
| Coronary heart disease | 5 (2.8) | 1 (2.6) | 4 (2.8) | 1 (2.7) | 1 (2.5) | 2 (3.1) |
| AHI, events/h | 27.7±9.3 | 3.6±1.1 | 30.4±12.0* | 10.4±3.5* | 25.0±11.3* | 45.4±12.0* |
| AHIREM, events/h | 18.6±9.6 | 2.4±0.8 | 24.5±9.4* | 10.1±3.1* | 16.2±10.2* | 33.5±11.9* |
| AHINREM, events/h | 22.7±11.3 | 3.0±1.2 | 26.7±12.3* | 9.8±2.9* | 23.6±12.5* | 24.7±10.7* |
| oAHI, events/h | 22.7±7.5 | 2.9±0.9 | 20.7±10.3* | 8.6±2.9* | 15.0±8.7* | 35.3±11.4 |
| cAHI, events/h | 6.4±6.1 | 0.9±0.3 | 11.1±9.6* | 2.0±1.3* | 9.3±7.6* | 9.7±5.4* |
| Time <90% of SpO2, min | 33.9±19.9 | 3.3±7.3 | 50.9±19.0* | 25.6±9.6* | 43.2±17.6* | 88.2±22.4* |
| Time of OD per hour, min | 13.7±4.0 | 3.0±3.9 | 19.4±4.3* | 9.6±3.9* | 23.3±5.8* | 28.3±6.6* |
| Mean HR during sleep, bpm | 60.6±10.8 | 62.3±6.6 | 59.6±12.5 | 63.2±8.2 | 61.2±7.6 | 54.2±10.3 |
| DLOD, s | 76.0±16.8 | 58.6±13.1 | 85.4±19.2 | 56.1±9.5 | 68.3±11.5 | 115.4±19.2* |
| Nadir SpO2, % | 81.2±11.6 | 89.6±4.3 | 78.2±11.9 | 87.7±5.4 | 84.1±6.2 | 71.0±11.6 |
| LTA, s | 55.4±17.9 | 22.3±7.5 | 67.6±13.4 | 24.6±11.6 | 47.2±9.7* | 117.6±13.2* |
| Decrease RR ≥12%, n (%) | 102 (56.7) | 8 (21.1) | 94 (66.2) | 13 (35.1) | 29 (72.5) | 52 (80.0) |

CB, carotid body; AHI, apnea-hypopnea index; AHIREM, apnea-hypopnea index in rapid-eye-movement sleep (REM); AHINREM, apnea-hypopnea index in non-rapid-eye-movement sleep (NREM); oAHI, obstructive AHI during sleep; cAHI, central AHI during sleep; SpO2, pulse oxygen saturation; LTA, the longest time of apnea; HR, heart rate; DLOD, duration of lowest oxygen desaturation.

*P<0.05 versus Non-OSA group

**Supplementary Table 2.** Multivariable linear analysis of CB chemosensitivity (% decrease in RR) using the stepwise method

| Clinical variables | Beta (95%CI) | t | P | Beta (95%CI) | t | P |
| --- | --- | --- | --- | --- | --- | --- |
| Univariable, enter method | | | | Multivariable, stepwise method* | | |
| ODI | -0.094(-0.227-0.042) | 1.447 | 0.151 |  |  |  |
| AHI | 0.263(0.057-0.303) | 6.066 | 0.011 | 0.161 (0.084-0.238) | 4.138 | <0.001 |
| oAHI | 0.212(0.065-0.334) | 4.312 | 0.032 |  |  |  |
| cAHI | 0.032(0.002-0.851) | 0.964 | 0.616 |  |  |  |
| Time <90% of SpO2 | 0.014(-0.018-0.046) | 3.024 | 0.003 |  |  |  |
| LTA | 0.029(0.004-0.100) | 5.239 | 0.000 | 0.082 (0.026-0.138) | 2.893 | 0.004 |
| MAI | 0.043(0.003-0.112) | 1.871 | 0.064 |  |  |  |
| Duration of nadir SpO2 | 0.010(-0.022-0.042) | 1.686 | 0.094 |  |  |  |
| Abd. circumference | -0.199(-0.377- -0.021) | -1.290 | 0.199 |  |  |  |
| Mean SpO2 | 1.002(0.358-2.591) | 2.543 | 0.012 |  |  |  |
| Nadir SpO2 | -0.056(-0.359-0.001) | 0.841 | 0.402 |  |  |  |
| Age | 0.022(-0.054-0.121) | 0.601 | 0.549 |  |  |  |
| BMI | 0.878(0.444-1.311) | 0.618 | 0.538 |  |  |  |
| TS90 | -0.134(-0.061-0.328) | -1.670 | 0.098 |  |  |  |
| Fevents-in-REM | 0.418(0.185-0.432) | 5.013 | <0.001 | 0.365 (0.223-0.507) | 5.073 | <0.001 |
| Neck circumference | -0.101(-0.552-0.352) | -0.016 | 0.987 |  |  |  |
| Time < 95% of SpO2 | -0.004(-0.010-0.017) | -0.551 | 0.582 |  |  |  |
| Mean HR | -0.008(-0.163-0.081) | -0.172 | 0.864 |  |  |  |
| ESS | 0.126(-0.013-0.236) | 1.092 | 0.277 |  |  |  |

Variables to be tested in the multivariable linear analysis are chosen using the variables with a value of P < 0.1 in the univariable analysis. AHI, apnea-hypopnea index; oAHI, obstructive AHI during sleep; cAHI, central AHI during sleep; ESS, Epworth sleepiness scale; ODI, oxygen desaturation index; SpO2, pulse oxygen saturation; TS90, percentage of sleep duration with SpO2< 90%; LTA, the longest time of apnea; MAI, micro-arousal index; Abd. circumference, abdomen circumference; HR heart rate; Fevents inREM, the fraction of apnea-hypopnea events in rapid-eye-movement sleep (REM) (% total events). *adjusted r2=0.536, P=0.006.

**Supplementary Table 3.** Screening model for identifying high CB chemosensitivity by logistic regression

| Variables | OR | 95% CI | P |
| --- | --- | --- | --- |
| Univariable logistic regression – enter method | | | |
| ODI | 1.040 | 0.950-1.138 | 0.389 |
| AHI | 1.030 | 0.955-1.110 | 0.046 |
| oAHI | 1.221 | 0.793-1.338 | 0.054 |
| cAHI | 1.045 | 0.880-1.067 | 0.161 |
| Time <90% of SpO2 | 0.982 | 0.956-1.010 | 0.207 |
| LTA | 1.024 | 0.998-1.011 | 0.066 |
| MAI | 1.005 | 0.973-1.038 | 0.777 |
| Duration of nadir SpO2 | 0.995 | 0.980-1.011 | 0.561 |
| Abd. circumference | 0.935 | 0.850-1.028 | 0.163 |
| Mean SpO2 | 1.167 | 0.615-2.212 | 0.637 |
| Nadir SpO2 | 1.057 | 0.934-1.196 | 0.382 |
| Age | 1.049 | 0.988-1.102 | 0.058 |
| BMI | 1.268 | 1.030-1.561 | 0.025 |
| TS90 | 1.255 | 1.002-1.572 | 0.048 |
| Neck circumference | 1.073 | 0.866-1.329 | 0.520 |
| Fevents inREM | 1.127 | 1.028-1.236 | 0.011 |
| Time <95% of SpO2 | 0.993 | 0.985-1.001 | 0.076 |
| Mean HR | 0.920 | 0.848-0.988 | 0.044 |
| ESS | 1.005 | 1.000-1.010 | 0.674 |
| Duration of REM | 0.993 | 0.976-1.010 | 0.425 |

| Characteristics (n=35) | Results |
| --- | --- |
| Age, years, Mean±SD | 38.44±12.16 |
| Male, n (%) | 23 (65.71) |
| Female, n (%) | 12 (34.29) |
| BMI, Kg/m2, Mean±SD | 22.31±2.62 |
| Decrease of RR, %, Mean±SD | 9.85±14.08 |
| Decrease of VT, %, Mean±SD | 1.91±3.15 |
| Complications, n (%) | 0 (0%) |
| drug therapy, n (%) | 0 (%) |
| ESS, Mean±SD | 4±2 |
| Smoking, n (%) | 3 (8.6) |

**Supplementary Table 4.** Demographic variables of volunteer
